# Supplementary material for: Boosting oxygen evolution of layered double hydroxide through electronic coupling with ultralow noble metal doping
Source: Royal Society of Chemistry journal article supplement (doi:10.1039/d1dt03906g), 2021-12-22
Supplement: d1dt03906g1.pdf [file d1dt03906g1.pdf]

**Supporting Information for**  
**Boosting Oxygen Evolution of Layered Double Hydroxide through**  
**Electronic Coupling with Ultralow Noble Metal**

Zhao Li, Dongsheng Liu, Xinhua Lu, Minglin Du, Zhenyang Chen, Jingrui Teng,

Ruiqi Sha, Lin Tian\*

*School of Materials and Chemical Engineering, Xuzhou University of Technology,*

*Xuzhou 221018, P.R. China*

Corresponding author: Lin Tian (L. Tian)

E-mail: [xzittl@xzit.edu.cn](mailto:xzittl@xzit.edu.cn)

## **Experiments**

### **Materials**

All chemicals and solvents were used as received.  $\text{Co}(\text{NO}_3)_2 \cdot 6\text{H}_2\text{O}$ ,  $\text{Fe}(\text{NO}_3)_3 \cdot 9\text{H}_2\text{O}$ ,  $\text{Ni}(\text{NO}_3)_2 \cdot 6\text{H}_2\text{O}$ ,  $\text{MnCl}_2$ , and 2-MIM, were purchased from the Energy Chemical.  $\text{Zn}(\text{NO}_3)_2 \cdot 6\text{H}_2\text{O}$ ,  $\text{IrCl}_3$ ,  $\text{RuCl}_3$ , and  $\text{KOH}$  were purchased from Sinopharm Chemical Reagent Co., Ltd. Methanol, ethanol, propanol, and butanol were purchased from Tianjin Fuyu Fine Chemical Co., Ltd. Nafion was bought from the DuPont.

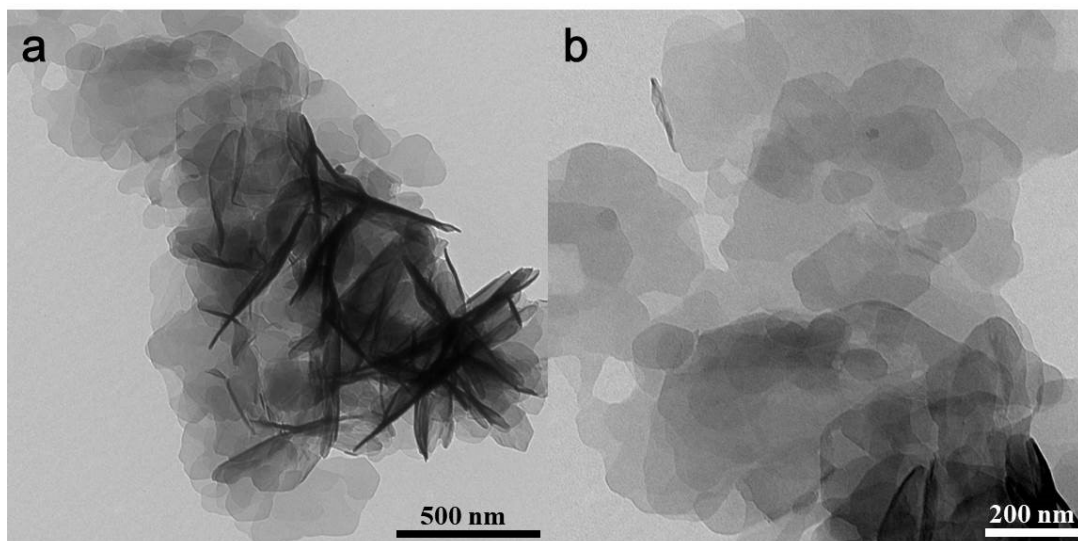

**Fig.S1** Representative TEM images of the ultrathin  $\text{Co(OH)}_2$  nanosheets.

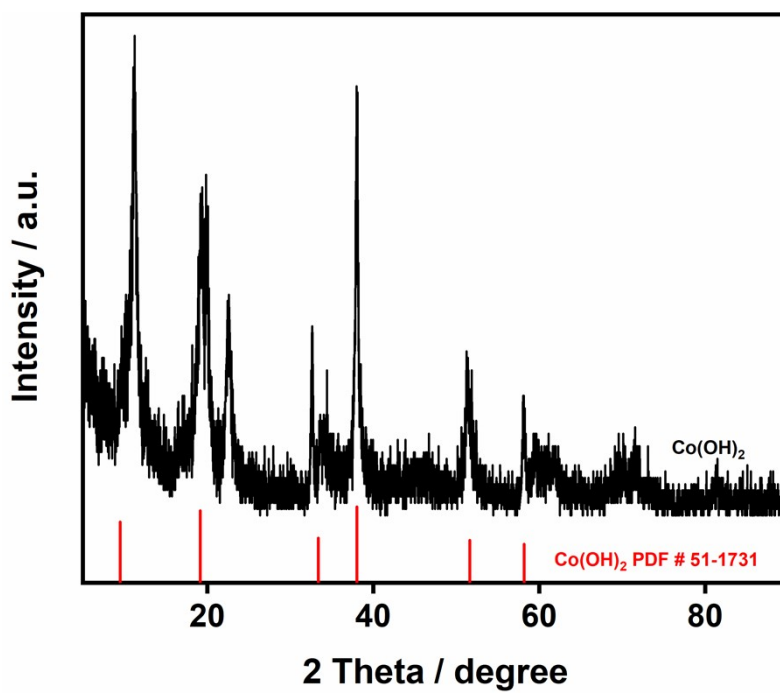

**Fig.S2** XRD pattern of the  $\text{Co(OH)}_2$  nanosheets.

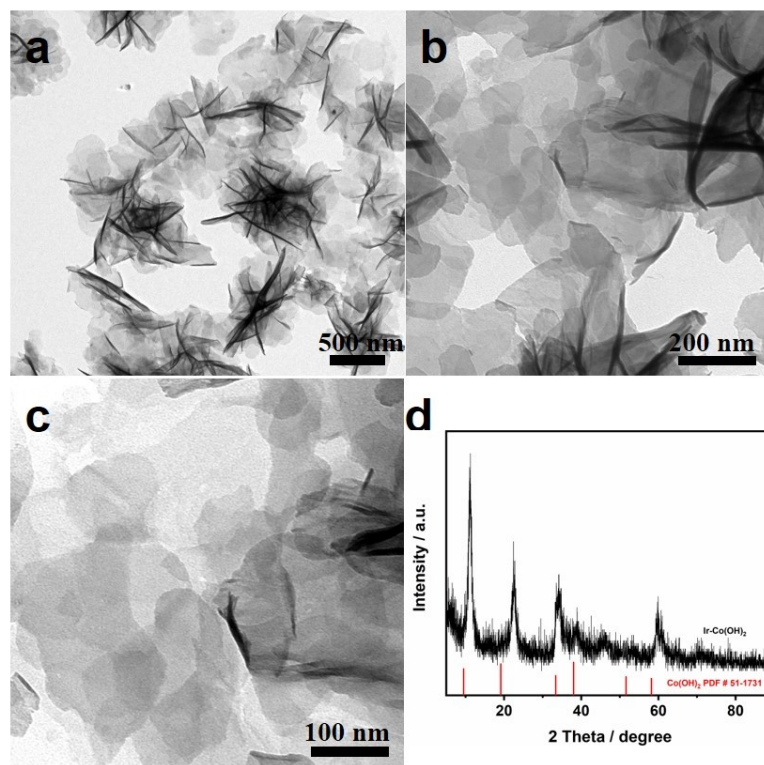

**Fig.S3** (a-c) Representative TEM images of the Ir-Co(OH)<sub>2</sub> nanosheets. (d) XRD pattern of the Ir-Co(OH)<sub>2</sub> nanosheets.

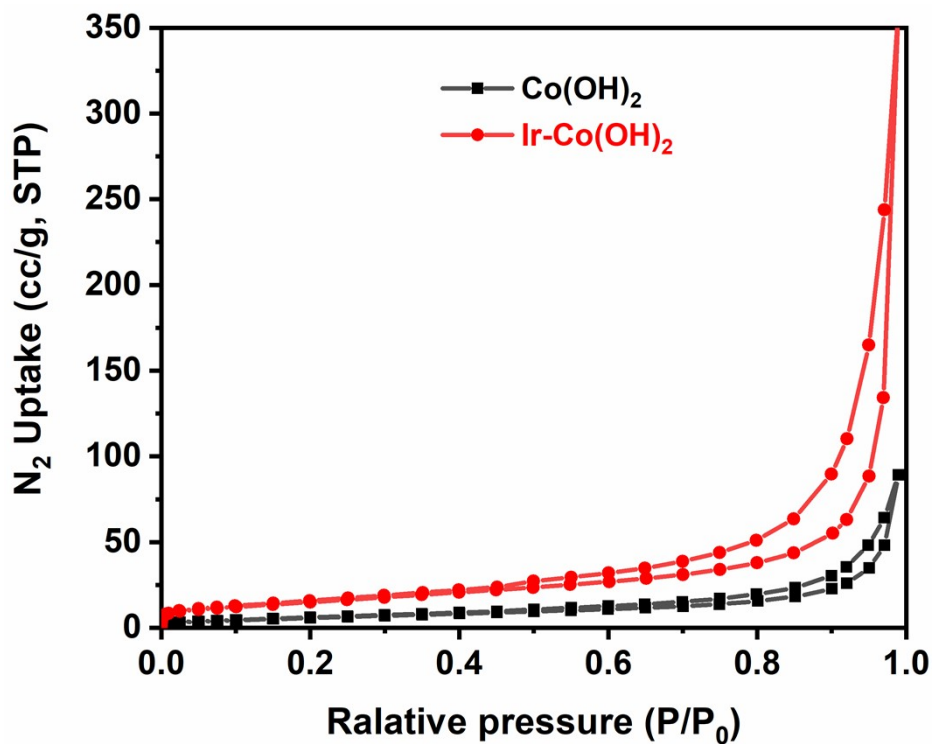

**Fig.S4** The N<sub>2</sub> adsorption-desorption isotherms of Ir-doped Co(OH)<sub>2</sub> and Co(OH)<sub>2</sub>.

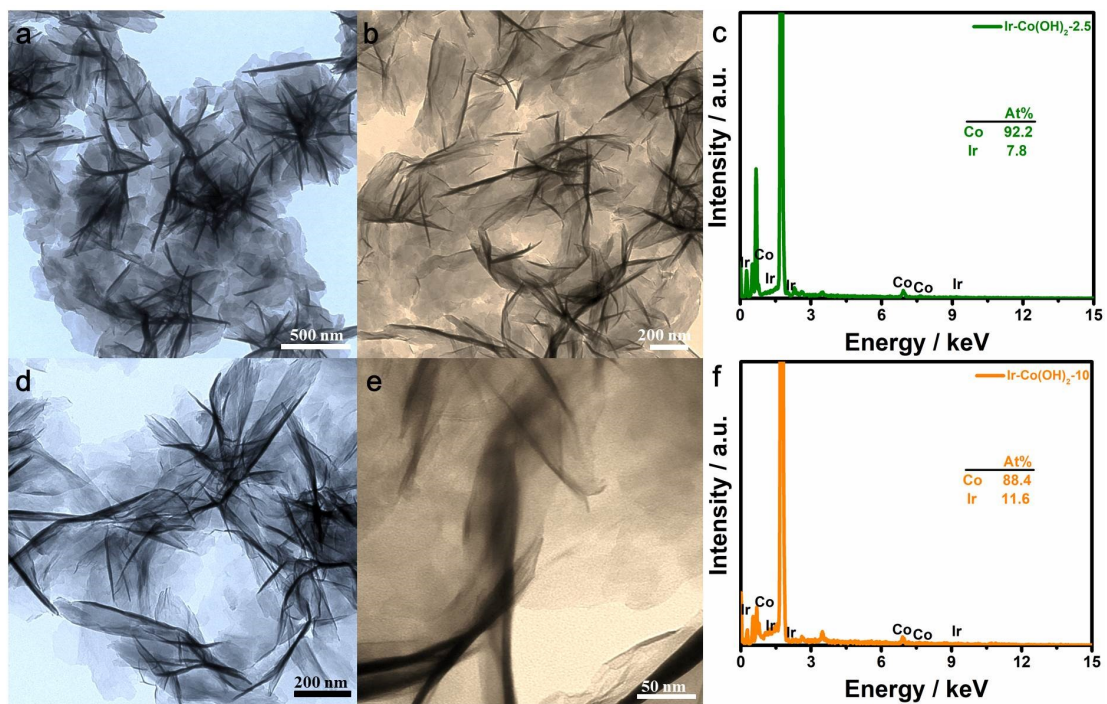

**Fig.S5** Representative TEM images of the (a, b) Ir-Co(OH)<sub>2</sub>-2.5 and (d, e) Ir-Co(OH)<sub>2</sub>-10 nanosheets. SEM-EDX spectra of the (c) Ir-Co(OH)<sub>2</sub>-2.5 and (f) Ir-Co(OH)<sub>2</sub>-10 nanosheets.

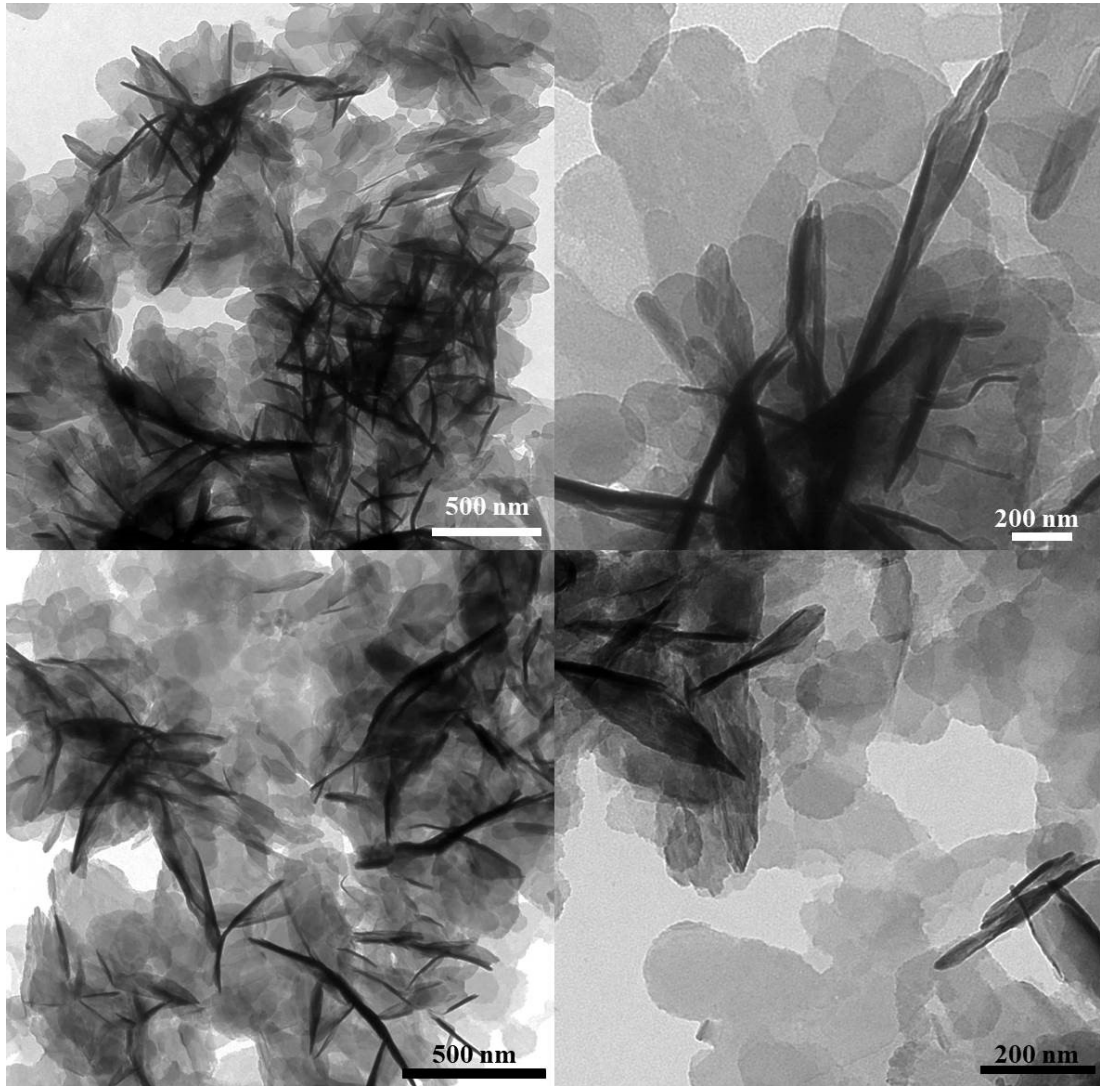

**Fig.S6** Representative TEM images of the Ru-doped  $\text{Co}(\text{OH})_2$  ultrathin nanosheets with different magnifications.

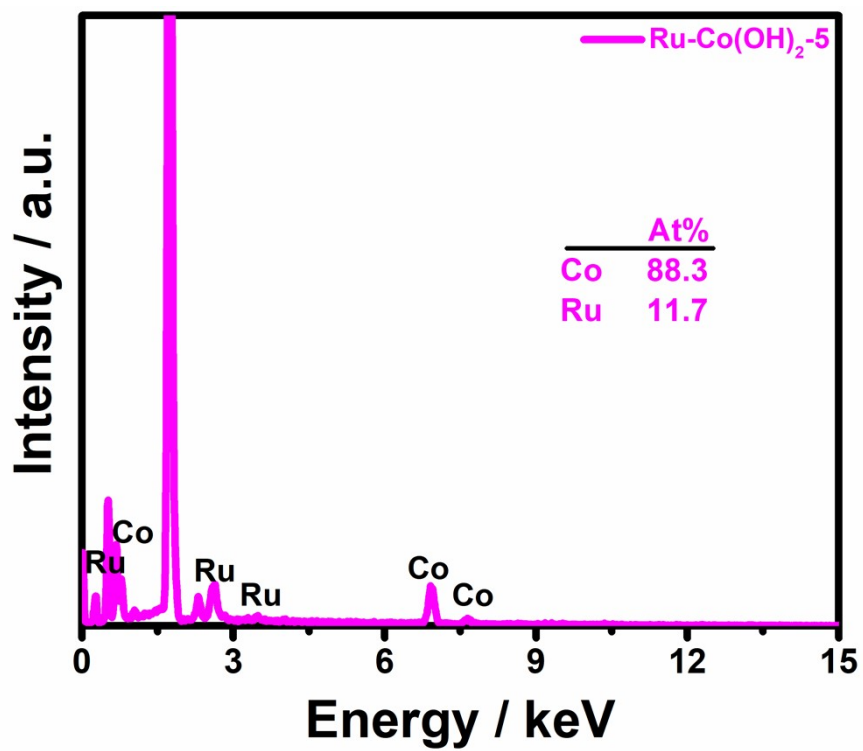

Fig.S7 SEM-EDX spectrum of the Ru-Co(OH)<sub>2</sub>-5.

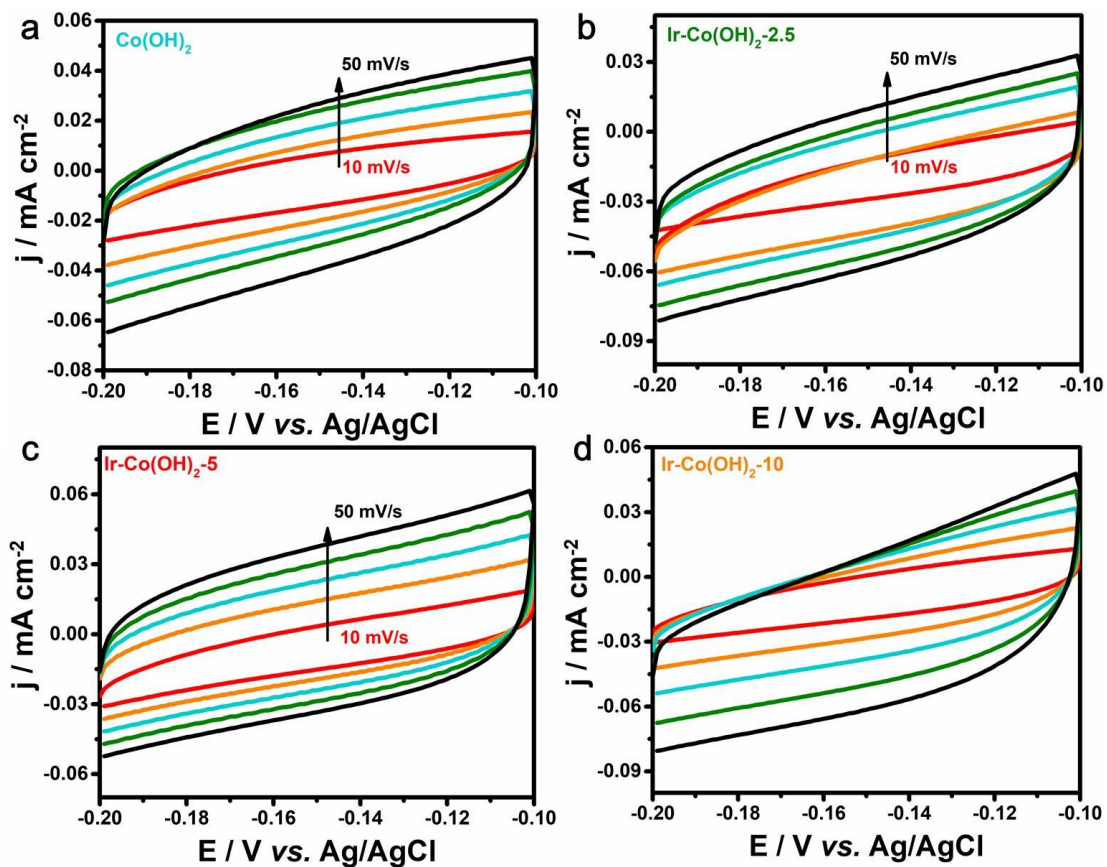

**Fig.S8** The CV curves of (a)  $\text{Co(OH)}_2$ , (b)  $\text{Ir-Co(OH)}_2-2.5$ , (c)  $\text{Ir-Co(OH)}_2-5$ , and (d)  $\text{Ir-Co(OH)}_2-10$  with different scan rates.

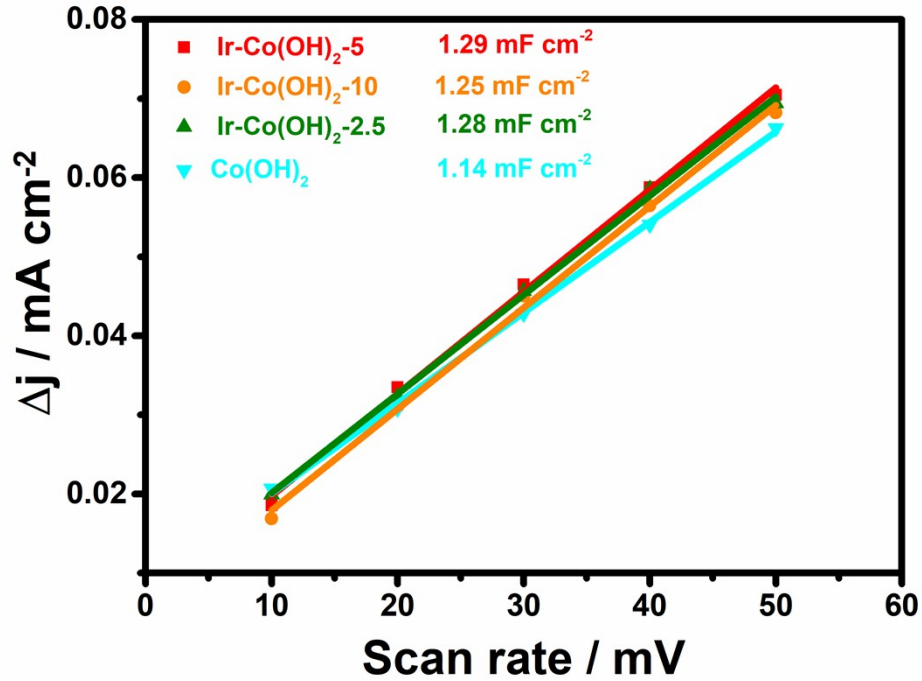

**Fig.S9** Plots of the current densities at -0.15 V (vs Ag/AgCl) vs scan rate for the Co(OH)<sub>2</sub>, Ir-Co(OH)<sub>2</sub>-2.5, Ir-Co(OH)<sub>2</sub>-5, and Ir-Co(OH)<sub>2</sub>-10.

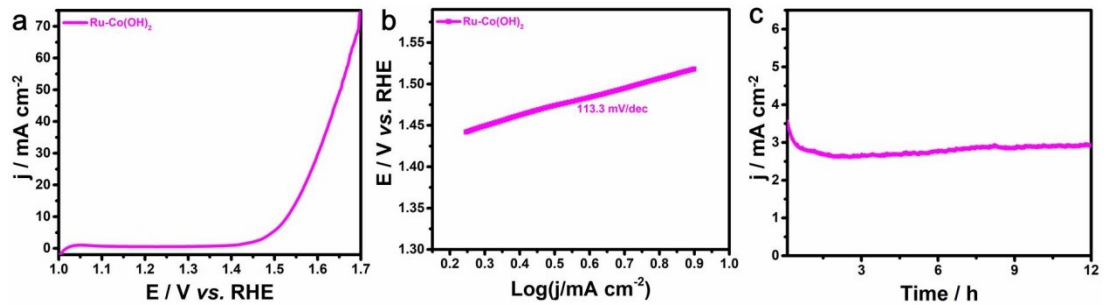

**Fig.S10** OER polarization curves of Ru-Co(OH)<sub>2</sub>-5 in 1 M KOH solution at the scan rate of 5 mV/s. Tafel plot of the Ru-Co(OH)<sub>2</sub>-5. CA curve of the Ru-Co(OH)<sub>2</sub>-5 at the potential of 1.5 V.



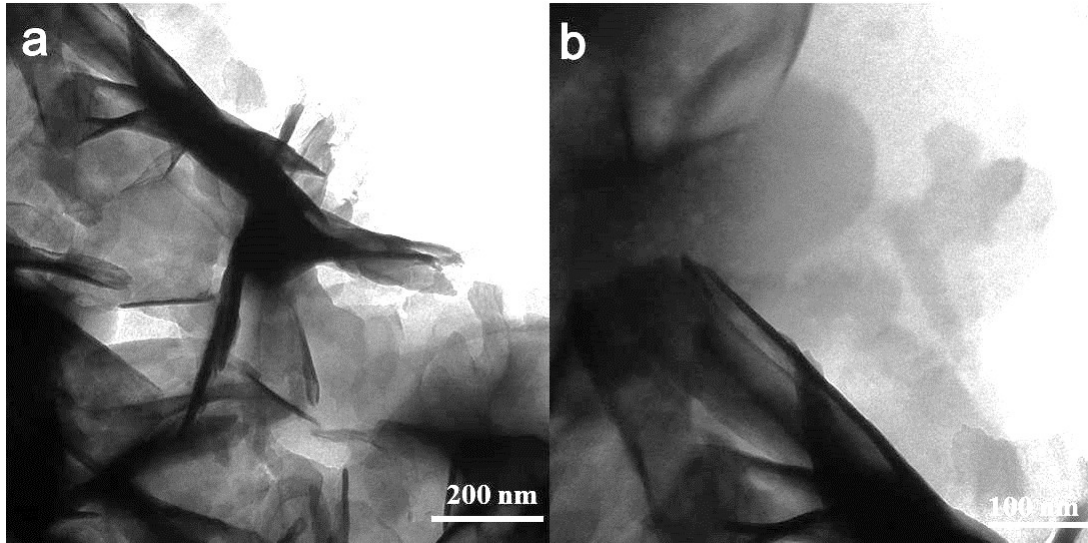

**Fig.S11** The representative TEM images of the Ir-Co(OH)<sub>2</sub>-5 after electrochemical measurements.
